# Supplementary material for: Small and genetically highly structured populations in a long-legged bee, Rediviva longimanus, as inferred by pooled RAD-seq
Source: BMC Evol Biol. 2018 Dec 19;18:196. doi: 10.1186/s12862-018-1313-z (PMC6300007; doi:10.1186/s12862-018-1313-z)
Supplement: Supplementary file 1 — Pairwise test for significant differences in relative FLL between Rediviva longimanus population pools. (XLSX 10 kb) [file 12862_2018_1313_MOESM1_ESM.xlsx]

## Sheet: leg-length-differences-R-out
Additional file 1: Pairwise test for significant differences in relative FLL between Rediviva longimanus population pools.
	Estimate	lower CI	upper CI	SE	t-value	p-value
LC vs. AP	-0.80091	-1.01264	-0.58918	0.08083	-9.909	<0.0001
LF vs. AP	-0.49042	-0.7037	-0.27714	0.08142	-6.024	<0.0001
LI vs. AP	-0.55816	-0.7659	-0.35042	0.0793	-7.038	<0.0001
LF vs. LC	0.31049	0.13825	0.48273	0.06575	4.722	<0.0001
LI vs. LC	0.24275	0.07742	0.40808	0.06311	3.846	0.00125
LI vs. LF	-0.06774	-0.23505	0.09957	0.06387	-1.061	0.71178
